# Supplementary material for: Modeling ion permeation through a bacterial voltage-gated calcium channel CaVAb using molecular dynamics simulations
Source: Royal Society of Chemistry journal article supplement (doi:10.1039/c6mb00690f), 2016-12-05
Supplement: c6mb00690f1.pdf [file c6mb00690f1.pdf]

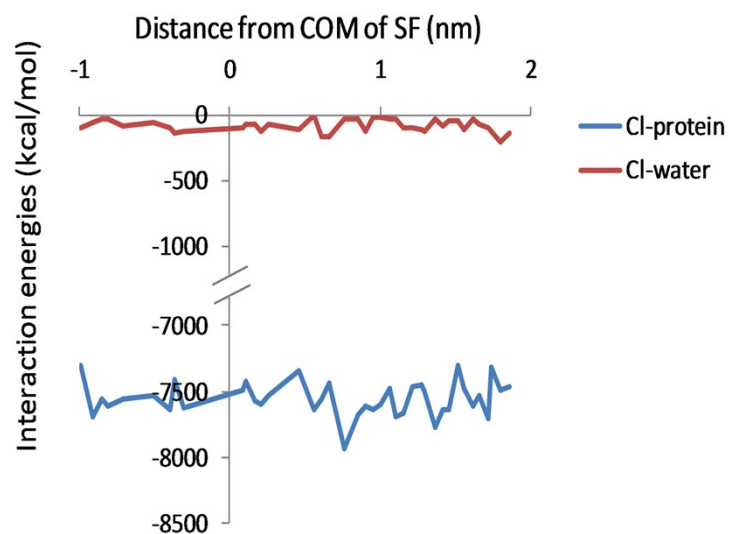

**Supplementary Figure 1.** Interaction energies of the  $\text{Cl}^-$  anion with the water and protein. the  $\text{Cl}^-$ -protein (blue) and  $\text{Cl}^-$ -water (red) interactions are plotted as a function of the axial position of the ion in the pore. As the anion continues to move through the center of the selectivity filter, the ion-protein and the ion-water interactions become less and more negative, respectively.
